# Supplementary material for: A universal descriptor for two-dimensional carbon nitride-based single-atom electrocatalysts towards the nitrogen reduction reaction
Source: Royal Society of Chemistry journal article supplement (doi:10.1039/d4ta05067c), 2024-01-01
Supplement: d4ta05067c1.pdf [file d4ta05067c1.pdf]

## ***Supplementary Information***

### **Universal descriptor for two-dimensional carbon nitrides based single-atom electrocatalysts towards nitrogen reduction reaction**

Mengmeng Xu,<sup>1,2</sup> Yujin Ji,<sup>1,\*</sup> Yuyang Qin,<sup>2</sup> Huilong Dong,<sup>2,3,\*</sup> Youyong Li<sup>1,4,\*</sup>

1. Institute of Functional Nano & Soft Materials (FUNSOM), Soochow University, Suzhou, Jiangsu, 215123, China
2. School of Materials Engineering, Changshu Institute of Technology, Changshu, Jiangsu, 215500, China
3. National Center for International Research on Intelligent Nano-Materials and Detection Technology in Environmental Protection, Soochow University, Suzhou, 215123, China
4. Macao Institute of Materials Science and Engineering, Macau University of Science and Technology, Taipa 999078, Macau SAR, China

\* Corresponding authors.

E-mail: yjji@suda.edu.cn (Y. Ji); huilong\_dong@126.com (H. Dong);  
yyli@suda.edu.cn (Y. Li)

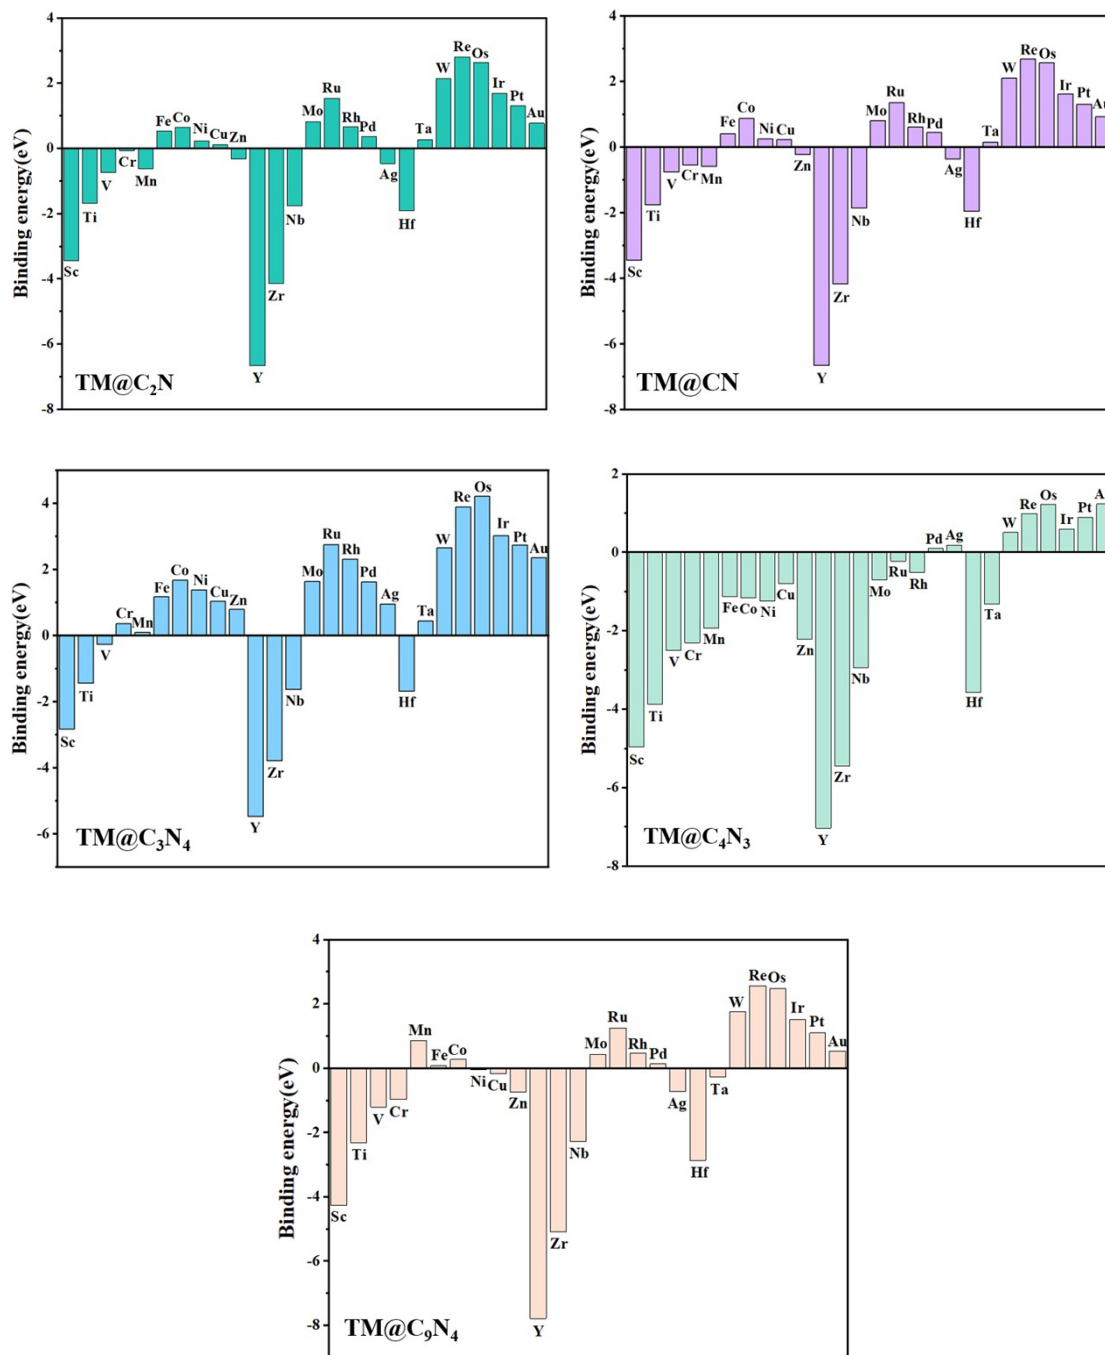

**Figure S1.** The binding energy ( $E^{bind}$ ) diagrams of TM@C<sub>2</sub>N, TM@CN, TM@C<sub>3</sub>N<sub>4</sub>, TM@C<sub>4</sub>N<sub>3</sub>, and TM@C<sub>9</sub>N<sub>4</sub>.

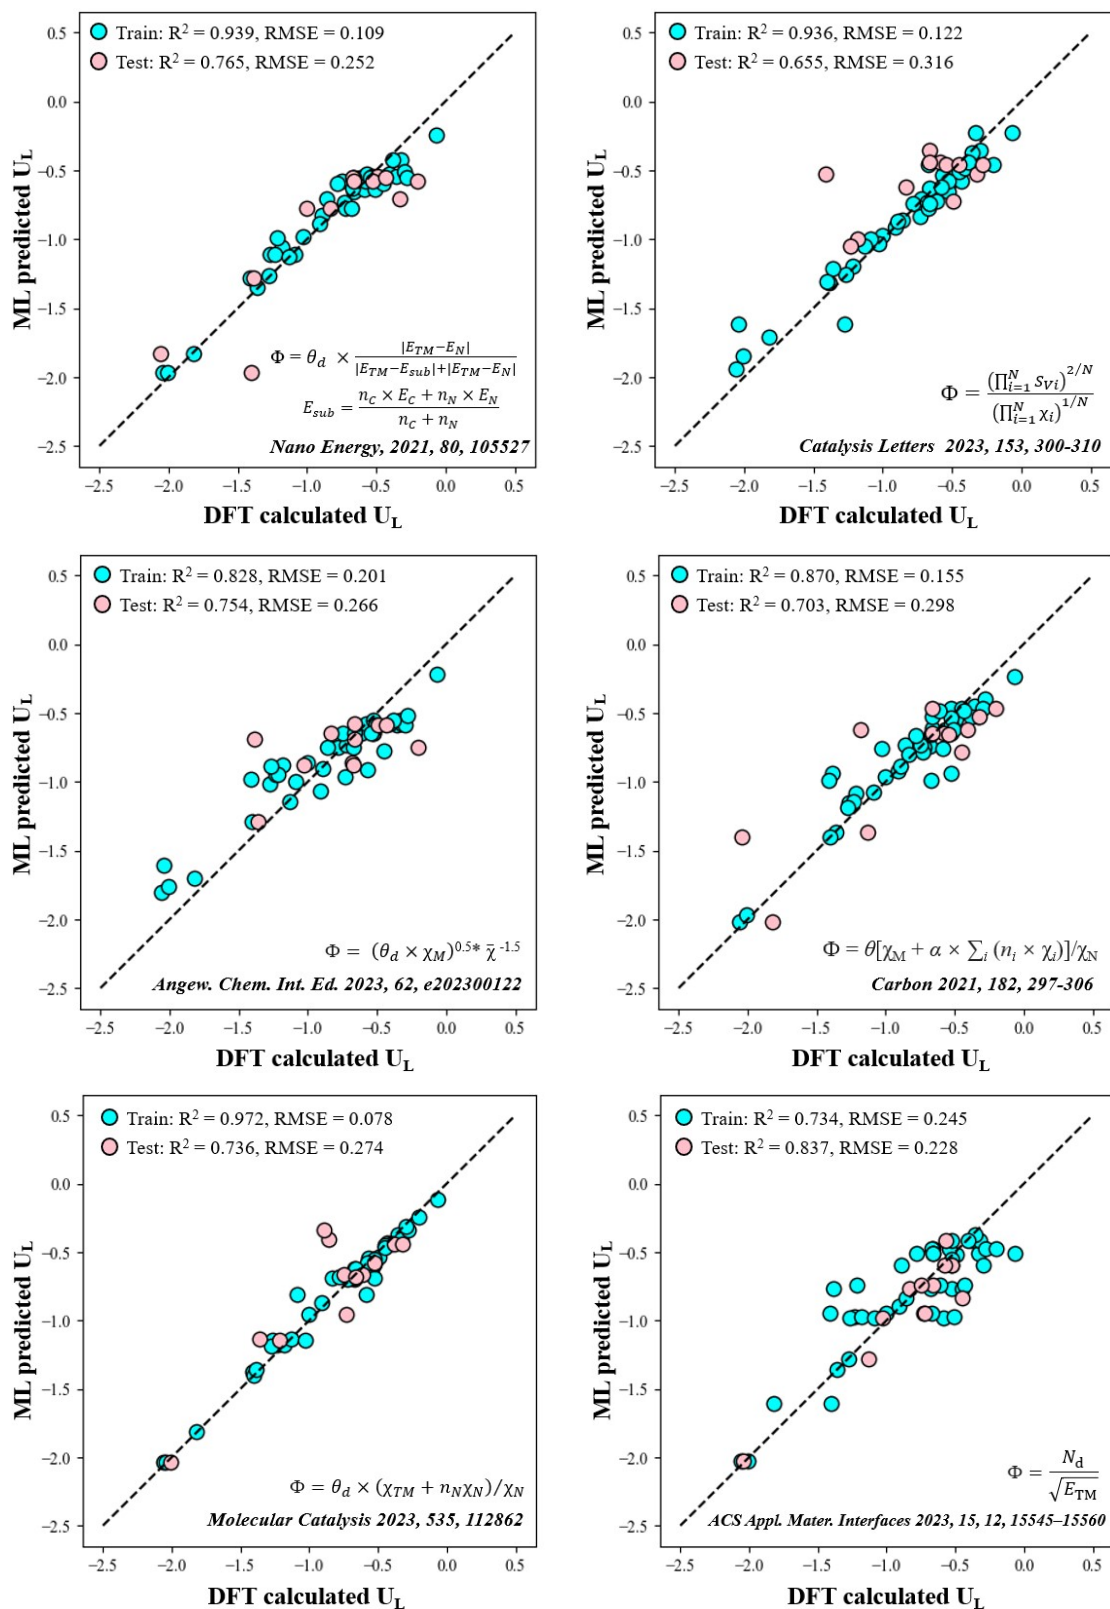

**Figure S2.** The fitting results between predicted  $U_L$  and DFT calculated  $U_L$  using the previously reported NRR descriptors for the TM@CN<sub>x</sub> system.

**Table S1.** Band gap (eV) for all systems (130 SACs, including TM@C<sub>2</sub>N, TM@CN, TM@C<sub>3</sub>N<sub>4</sub>, TM@C<sub>4</sub>N<sub>3</sub>, and TM@C<sub>9</sub>N<sub>4</sub>).

| SACs                | Band gap (eV) | SACs  | Band gap (eV) |
|---------------------|---------------|-------|---------------|
| Sc@C <sub>2</sub> N | 0.0141        | Sc@CN | 0.0012        |
| Ti@C <sub>2</sub> N | 0.0549        | Ti@CN | 0.1491        |
| V@C <sub>2</sub> N  | 0.0856        | V@CN  | 0.1278        |
| Cr@C <sub>2</sub> N | 0.0062        | Cr@CN | 0.0032        |
| Mn@C <sub>2</sub> N | 0.0026        | Mn@CN | 0.0007        |
| Fe@C <sub>2</sub> N | 0.0015        | Fe@CN | 0.0552        |
| Co@C <sub>2</sub> N | 0.0017        | Co@CN | 0.0044        |
| Ni@C <sub>2</sub> N | 0.0051        | Ni@CN | 0.0226        |
| Cu@C <sub>2</sub> N | 0.0008        | Cu@CN | 0.0031        |
| Zn@C <sub>2</sub> N | 0.1547        | Zn@CN | 0.2499        |
| Y@C <sub>2</sub> N  | 0.0013        | Y@CN  | 0.004         |
| Zr@C <sub>2</sub> N | 0.0005        | Zr@CN | 0.063         |
| Nb@C <sub>2</sub> N | 0.0213        | Nb@CN | 0.0007        |
| Mo@C <sub>2</sub> N | 0.0606        | Mo@CN | 0.0641        |
| Ru@C <sub>2</sub> N | 0.0791        | Ru@CN | 0.0379        |
| Rh@C <sub>2</sub> N | 0.0023        | Rh@CN | 0.0049        |
| Pd@C <sub>2</sub> N | 0.0025        | Pd@CN | 0.0037        |
| Ag@C <sub>2</sub> N | 0.0012        | Ag@CN | 0.0049        |
| Hf@C <sub>2</sub> N | 0.0802        | Hf@CN | 0.0371        |
| Ta@C <sub>2</sub> N | 0.0685        | Ta@CN | 0.0425        |
| W@C <sub>2</sub> N  | 0.1024        | W@CN  | 0.1409        |
| Re@C <sub>2</sub> N | 0.0718        | Re@CN | 0.0068        |
| Os@C <sub>2</sub> N | 0.3719        | Os@CN | 0.1928        |
| Ir@C <sub>2</sub> N | 0.0003        | Ir@CN | 0.0004        |
| Pt@C <sub>2</sub> N | 0.1359        | Pt@CN | 0.181         |
| Au@C <sub>2</sub> N | 0.0048        | Au@CN | 0.0051        |

|                                  |        |                                  |        |
|----------------------------------|--------|----------------------------------|--------|
| Sc@C <sub>3</sub> N <sub>4</sub> | 0.0041 | Sc@C <sub>4</sub> N <sub>3</sub> | 0.0025 |
| Ti@C <sub>3</sub> N <sub>4</sub> | 0.0031 | Ti@C <sub>4</sub> N <sub>3</sub> | 0.0312 |
| V@C <sub>3</sub> N <sub>4</sub>  | 0.0059 | V@C <sub>4</sub> N <sub>3</sub>  | 0.0018 |
| Cr@C <sub>3</sub> N <sub>4</sub> | 0.0072 | Cr@C <sub>4</sub> N <sub>3</sub> | 0.0042 |
| Mn@C <sub>3</sub> N <sub>4</sub> | 0.0151 | Mn@C <sub>4</sub> N <sub>3</sub> | 0.0009 |
| Fe@C <sub>3</sub> N <sub>4</sub> | 0.0006 | Fe@C <sub>4</sub> N <sub>3</sub> | 0.003  |
| Co@C <sub>3</sub> N <sub>4</sub> | 0.0008 | Co@C <sub>4</sub> N <sub>3</sub> | 0.0038 |
| Ni@C <sub>3</sub> N <sub>4</sub> | 0.0022 | Ni@C <sub>4</sub> N <sub>3</sub> | 0.0008 |
| Cu@C <sub>3</sub> N <sub>4</sub> | 0.0036 | Cu@C <sub>4</sub> N <sub>3</sub> | 0.0026 |
| Zn@C <sub>3</sub> N <sub>4</sub> | 0.0031 | Zn@C <sub>4</sub> N <sub>3</sub> | 0.0281 |
| Y@C <sub>3</sub> N <sub>4</sub>  | 0.0045 | Y@C <sub>4</sub> N <sub>3</sub>  | 0.0031 |
| Zr@C <sub>3</sub> N <sub>4</sub> | 0.0098 | Zr@C <sub>4</sub> N <sub>3</sub> | 0.0208 |
| Nb@C <sub>3</sub> N <sub>4</sub> | 0.0087 | Nb@C <sub>4</sub> N <sub>3</sub> | 0.0009 |
| Mo@C <sub>3</sub> N <sub>4</sub> | 0.0025 | Mo@C <sub>4</sub> N <sub>3</sub> | 0.0006 |
| Ru@C <sub>3</sub> N <sub>4</sub> | 0.0004 | Ru@C <sub>4</sub> N <sub>3</sub> | 0.0041 |
| Rh@C <sub>3</sub> N <sub>4</sub> | 0.0025 | Rh@C <sub>4</sub> N <sub>3</sub> | 0.0038 |
| Pd@C <sub>3</sub> N <sub>4</sub> | 0.0018 | Pd@C <sub>4</sub> N <sub>3</sub> | 0.0088 |
| Ag@C <sub>3</sub> N <sub>4</sub> | 0.0015 | Ag@C <sub>4</sub> N <sub>3</sub> | 0.0032 |
| Hf@C <sub>3</sub> N <sub>4</sub> | 0.0021 | Hf@C <sub>4</sub> N <sub>3</sub> | 0.0211 |
| Ta@C <sub>3</sub> N <sub>4</sub> | 0.0163 | Ta@C <sub>4</sub> N <sub>3</sub> | 0.0023 |
| W@C <sub>3</sub> N <sub>4</sub>  | 0.0006 | W@C <sub>4</sub> N <sub>3</sub>  | 0.0015 |
| Re@C <sub>3</sub> N <sub>4</sub> | 0.0123 | Re@C <sub>4</sub> N <sub>3</sub> | 0.0005 |
| Os@C <sub>3</sub> N <sub>4</sub> | 0.0229 | Os@C <sub>4</sub> N <sub>3</sub> | 0.0023 |
| Ir@C <sub>3</sub> N <sub>4</sub> | 0.0027 | Ir@C <sub>4</sub> N <sub>3</sub> | 0.0027 |
| Pt@C <sub>3</sub> N <sub>4</sub> | 0.0051 | Pt@C <sub>4</sub> N <sub>3</sub> | 0.0109 |
| Au@C <sub>3</sub> N <sub>4</sub> | 0.0038 | Au@C <sub>4</sub> N <sub>3</sub> | 0.0042 |
| Sc@C <sub>9</sub> N <sub>4</sub> | 0.0022 | Cr@C <sub>9</sub> N <sub>4</sub> | 0.0045 |
| Ti@C <sub>9</sub> N <sub>4</sub> | 0.0031 | Mn@C <sub>9</sub> N <sub>4</sub> | 0.0031 |
| V@C <sub>9</sub> N <sub>4</sub>  | 0.0049 | Fe@C <sub>9</sub> N <sub>4</sub> | 0.0012 |

|                                  |        |                                  |        |
|----------------------------------|--------|----------------------------------|--------|
| Co@C <sub>9</sub> N <sub>4</sub> | 0.0027 | Pd@C <sub>9</sub> N <sub>4</sub> | 0.0021 |
| Ni@C <sub>9</sub> N <sub>4</sub> | 0.0018 | Ag@C <sub>9</sub> N <sub>4</sub> | 0.0039 |
| Cu@C <sub>9</sub> N <sub>4</sub> | 0.0007 | Hf@C <sub>9</sub> N <sub>4</sub> | 0.0022 |
| Zn@C <sub>9</sub> N <sub>4</sub> | 0.0015 | Ta@C <sub>9</sub> N <sub>4</sub> | 0.0016 |
| Y@C <sub>9</sub> N <sub>4</sub>  | 0.0053 | W@C <sub>9</sub> N <sub>4</sub>  | 0.0026 |
| Zr@C <sub>9</sub> N <sub>4</sub> | 0.0015 | Re@C <sub>9</sub> N <sub>4</sub> | 0.0056 |
| Nb@C <sub>9</sub> N <sub>4</sub> | 0.0013 | Os@C <sub>9</sub> N <sub>4</sub> | 0.001  |
| Mo@C <sub>9</sub> N <sub>4</sub> | 0.0058 | Ir@C <sub>9</sub> N <sub>4</sub> | 0.0032 |
| Ru@C <sub>9</sub> N <sub>4</sub> | 0.0045 | Pt@C <sub>9</sub> N <sub>4</sub> | 0.008  |
| Rh@C <sub>9</sub> N <sub>4</sub> | 0.0023 | Au@C <sub>9</sub> N <sub>4</sub> | 0.0043 |

**Table S2.** The N≡N bond lengths  $d_{\text{N-N}}$  (Å) of  $\text{N}_2$  molecule on the initially screened TM@CN<sub>x</sub> catalysts, along with corresponding adsorption configuration (AC) and adsorption energy  $E_{\text{ads}}$  (eV).

| SACs                             | $d_{\text{N-N}}$ (Å) | AC      | $E_{\text{ads}}$ (eV) |
|----------------------------------|----------------------|---------|-----------------------|
| Sc@C <sub>2</sub> N              | 1.1534               | side-on | -0.06                 |
| Ti@C <sub>2</sub> N              | 1.1723               | side-on | -0.26                 |
| V@C <sub>2</sub> N               | 1.1498               | side-on | 0.07                  |
| Cr@C <sub>2</sub> N              | 1.1243               | end-on  | -0.40                 |
| Mn@C <sub>2</sub> N              | 1.1245               | end-on  | 0                     |
| Zn@C <sub>2</sub> N              | 1.1161               | end-on  | 0.05                  |
| Y@C <sub>2</sub> N               | 1.1519               | side-on | -0.10                 |
| Zr@C <sub>2</sub> N              | 1.1416               | end-on  | -0.82                 |
| Nb@C <sub>2</sub> N              | 1.1460               | end-on  | -0.76                 |
| Ag@C <sub>2</sub> N              | 1.1147               | end-on  | 0.44                  |
| Hf@C <sub>2</sub> N              | 1.1917               | side-on | -0.49                 |
| Sc@CN                            | 1.1536               | side-on | -0.05                 |
| Ti@CN                            | 1.1376               | end-on  | -0.55                 |
| V@CN                             | 1.1737               | side-on | 0.18                  |
| Cr@CN                            | 1.1261               | end-on  | 0.09                  |
| Mn@CN                            | 1.1503               | side-on | 0.26                  |
| Zn@CN                            | 1.1157               | end-on  | 0.04                  |
| Y@CN                             | 1.1520               | side-on | -0.08                 |
| Zr@CN                            | 1.1418               | end-on  | -0.78                 |
| Nb@CN                            | 1.1457               | end-on  | -0.80                 |
| Ag@CN                            | 1.1150               | end-on  | 0.36                  |
| Hf@CN                            | 1.1915               | side-on | -0.50                 |
| Sc@C <sub>3</sub> N <sub>4</sub> | 1.1367               | end-on  | -0.41                 |
| Ti@C <sub>3</sub> N <sub>4</sub> | 1.1445               | end-on  | -0.55                 |
| V@C <sub>3</sub> N <sub>4</sub>  | 1.1496               | end-on  | 0.03                  |

---

|                                  |        |         |       |
|----------------------------------|--------|---------|-------|
| Y@C <sub>3</sub> N <sub>4</sub>  | 1.1534 | side-on | -1.53 |
| Zr@C <sub>3</sub> N <sub>4</sub> | 1.1506 | end-on  | -0.49 |
| Nb@C <sub>3</sub> N <sub>4</sub> | 1.1553 | end-on  | -0.50 |
| Hf@C <sub>3</sub> N <sub>4</sub> | 1.1559 | end-on  | -0.59 |
| Sc@C <sub>4</sub> N <sub>3</sub> | 1.1214 | end-on  | -0.05 |
| Ti@C <sub>4</sub> N <sub>3</sub> | 1.1623 | side-on | -0.08 |
| V@C <sub>4</sub> N <sub>3</sub>  | 1.1750 | side-on | -0.57 |
| Cr@C <sub>4</sub> N <sub>3</sub> | 1.1832 | side-on | 0.11  |
| Mn@C <sub>4</sub> N <sub>3</sub> | 1.1436 | side-on | -0.04 |
| Fe@C <sub>4</sub> N <sub>3</sub> | 1.1684 | side-on | -0.15 |
| Co@C <sub>4</sub> N <sub>3</sub> | 1.1536 | side-on | 0.06  |
| Ni@C <sub>4</sub> N <sub>3</sub> | 1.1269 | end-on  | -0.25 |
| Cu@C <sub>4</sub> N <sub>3</sub> | 1.1454 | side-on | -0.02 |
| Zn@C <sub>4</sub> N <sub>3</sub> | 1.1162 | end-on  | 0.10  |
| Y@C <sub>4</sub> N <sub>3</sub>  | 1.1211 | end-on  | 0.02  |
| Zr@C <sub>4</sub> N <sub>3</sub> | 1.1680 | side-on | -0.11 |
| Nb@C <sub>4</sub> N <sub>3</sub> | 1.1874 | side-on | -0.72 |
| Mo@C <sub>4</sub> N <sub>3</sub> | 1.2055 | side-on | -0.76 |
| Ru@C <sub>4</sub> N <sub>3</sub> | 1.1356 | side-on | -0.97 |
| Rh@C <sub>4</sub> N <sub>3</sub> | 1.1269 | end-on  | -0.68 |
| Hf@C <sub>4</sub> N <sub>3</sub> | 1.1605 | side-on | -0.23 |
| Ta@C <sub>4</sub> N <sub>3</sub> | 1.1916 | side-on | -0.95 |
| Sc@C <sub>9</sub> N <sub>4</sub> | 1.1455 | side-on | 0.11  |
| Ti@C <sub>9</sub> N <sub>4</sub> | 1.1772 | side-on | -0.03 |
| V@C <sub>9</sub> N <sub>4</sub>  | 1.1508 | side-on | 0.15  |
| Cr@C <sub>9</sub> N <sub>4</sub> | 1.1242 | side-on | 0.13  |
| Ni@C <sub>9</sub> N <sub>4</sub> | 1.1287 | side-on | -0.13 |
| Cu@C <sub>9</sub> N <sub>4</sub> | 1.1256 | end-on  | -0.29 |
| Zn@C <sub>9</sub> N <sub>4</sub> | 1.1161 | side-on | 0.40  |

---



---

|                                  |        |         |       |
|----------------------------------|--------|---------|-------|
| Y@C <sub>9</sub> N <sub>4</sub>  | 1.1388 | side-on | 0.04  |
| Zr@C <sub>9</sub> N <sub>4</sub> | 1.1793 | side-on | -0.20 |
| Nb@C <sub>9</sub> N <sub>4</sub> | 1.1487 | end-on  | -0.08 |
| Ag@C <sub>9</sub> N <sub>4</sub> | 1.1158 | side-on | 0.38  |
| Hf@C <sub>9</sub> N <sub>4</sub> | 1.1923 | side-on | -0.15 |
| Ta@C <sub>9</sub> N <sub>4</sub> | 1.2122 | side-on | -0.17 |

---

**Table S3.** Gibbs free energy values ( $*N_2 \rightarrow *N_2H(PCET1)$  and  $*NH_2 \rightarrow *NH_3(PCET6)$ ) and limiting potential ( $U_L$ ) for 60 SACs.

| SACs                             | $\Delta G(*N_2 \rightarrow *N_2H)$<br>(eV) | $\Delta G(*NH_2 \rightarrow *NH_3)$<br>(eV) | $U_L$ (V) |
|----------------------------------|--------------------------------------------|---------------------------------------------|-----------|
| Sc@C <sub>2</sub> N              | 0.83                                       | -0.02                                       | -0.83     |
| Ti@C <sub>2</sub> N              | 0.67                                       | 0.04                                        | -0.67     |
| V@C <sub>2</sub> N               | 0.78                                       | -0.26                                       | -0.78     |
| Cr@C <sub>2</sub> N              | 1.09                                       | -0.56                                       | -1.09     |
| Mn@C <sub>2</sub> N              | 1.23                                       | -0.89                                       | -1.23     |
| Zn@C <sub>2</sub> N              | 1.45                                       | -1.12                                       | -1.45     |
| Y@C <sub>2</sub> N               | 0.72                                       | 0.09                                        | -0.72     |
| Zr@C <sub>2</sub> N              | 0.58                                       | 0.42                                        | -0.58     |
| Nb@C <sub>2</sub> N              | 0.38                                       | 0.25                                        | -0.38     |
| Ag@C <sub>2</sub> N              | 2.01                                       | -1.71                                       | -2.01     |
| Hf@C <sub>2</sub> N              | 0.44                                       | 0.66                                        | -0.66     |
| Sc@CN                            | 0.53                                       | 0.08                                        | -0.53     |
| Ti@CN                            | 0.66                                       | 0.01                                        | -0.66     |
| V@CN                             | 0.66                                       | -0.23                                       | -0.66     |
| Cr@CN                            | 1.03                                       | -0.78                                       | -1.03     |
| Mn@CN                            | 1.18                                       | -0.89                                       | -1.18     |
| Zn@CN                            | 1.49                                       | -1.13                                       | -1.49     |
| Y@CN                             | 0.67                                       | 0.13                                        | -0.67     |
| Zr@CN                            | 0.53                                       | 0.40                                        | -0.53     |
| Nb@CN                            | 0.41                                       | 0.28                                        | -0.41     |
| Ag@CN                            | 2.04                                       | -1.72                                       | -2.04     |
| Hf@CN                            | 0.46                                       | 0.61                                        | -0.61     |
| Sc@C <sub>3</sub> N <sub>4</sub> | -0.04                                      | 0.45                                        | -0.45     |
| Ti@C <sub>3</sub> N <sub>4</sub> | -0.31                                      | 0.28                                        | -0.28     |
| V@C <sub>3</sub> N <sub>4</sub>  | -0.44                                      | 0.07                                        | -0.07     |
| Y@C <sub>3</sub> N <sub>4</sub>  | 0.73                                       | 0.26                                        | -0.73     |

---

|                                  |       |       |       |
|----------------------------------|-------|-------|-------|
| Zr@C <sub>3</sub> N <sub>4</sub> | -0.55 | 0.89  | -0.89 |
| Nb@C <sub>3</sub> N <sub>4</sub> | -0.69 | 0.53  | -0.53 |
| Hf@C <sub>3</sub> N <sub>4</sub> | -0.49 | 1.22  | -1.22 |
| Sc@C <sub>4</sub> N <sub>3</sub> | 1.39  | -0.51 | -1.39 |
| Ti@C <sub>4</sub> N <sub>3</sub> | 0.20  | 0.06  | -0.20 |
| V@C <sub>4</sub> N <sub>3</sub>  | 0.33  | 0.14  | -0.33 |
| Cr@C <sub>4</sub> N <sub>3</sub> | 0.59  | -0.21 | -0.59 |
| Mn@C <sub>4</sub> N <sub>3</sub> | 0.51  | -0.17 | -0.51 |
| Fe@C <sub>4</sub> N <sub>3</sub> | 0.49  | -0.36 | -0.49 |
| Co@C <sub>4</sub> N <sub>3</sub> | 0.53  | -0.59 | -0.53 |
| Ni@C <sub>4</sub> N <sub>3</sub> | 1.13  | -0.81 | -1.13 |
| Cu@C <sub>4</sub> N <sub>3</sub> | 1.40  | -1.16 | -1.40 |
| Zn@C <sub>4</sub> N <sub>3</sub> | 1.64  | -1.39 | -1.64 |
| Y@C <sub>4</sub> N <sub>3</sub>  | 1.41  | -0.47 | -1.41 |
| Zr@C <sub>4</sub> N <sub>3</sub> | 0.26  | 0.30  | -0.30 |
| Nb@C <sub>4</sub> N <sub>3</sub> | -0.06 | 0.57  | -0.57 |
| Mo@C <sub>4</sub> N <sub>3</sub> | 0.15  | 0.36  | -0.36 |
| Ru@C <sub>4</sub> N <sub>3</sub> | 0.91  | -0.20 | -0.91 |
| Rh@C <sub>4</sub> N <sub>3</sub> | 1.36  | -0.81 | -1.36 |
| Hf@C <sub>4</sub> N <sub>3</sub> | 0.18  | 0.43  | -0.43 |
| Ta@C <sub>4</sub> N <sub>3</sub> | 0.11  | 0.86  | -0.86 |
| Sc@C <sub>9</sub> N <sub>4</sub> | 0.68  | -0.04 | -0.68 |
| Ti@C <sub>9</sub> N <sub>4</sub> | 0.54  | -0.02 | -0.54 |
| V@C <sub>9</sub> N <sub>4</sub>  | 0.66  | -0.34 | -0.66 |
| Cr@C <sub>9</sub> N <sub>4</sub> | 1.27  | -0.93 | -1.27 |
| Ni@C <sub>9</sub> N <sub>4</sub> | 1.28  | -1.34 | -1.28 |
| Cu@C <sub>9</sub> N <sub>4</sub> | 1.82  | -1.64 | -1.82 |
| Zn@C <sub>9</sub> N <sub>4</sub> | 1.21  | -1.22 | -1.21 |
| Y@C <sub>9</sub> N <sub>4</sub>  | 1.00  | -0.12 | -1.00 |

---

---

|                                  |      |       |       |
|----------------------------------|------|-------|-------|
| Zr@C <sub>9</sub> N <sub>4</sub> | 0.52 | 0.53  | -0.53 |
| Nb@C <sub>9</sub> N <sub>4</sub> | 0.30 | 0.32  | -0.32 |
| Ag@C <sub>9</sub> N <sub>4</sub> | 2.06 | -1.73 | -2.06 |
| Hf@C <sub>9</sub> N <sub>4</sub> | 0.34 | 0.75  | -0.75 |
| Ta@C <sub>9</sub> N <sub>4</sub> | 0.11 | 0.45  | -0.45 |

---

**Table S4.** The number of d electrons in TM atoms ( $\theta_d$ ), d-band center in TM atoms ( $\varepsilon_d$ ), the average electronegativity of the substrate ( $\chi_{sub}$ ), the electronegativity of TM ( $\chi_{TM}$ ) and the corresponding descriptor ( $\Phi$ ).

| SACs                             | $\theta_d$ | $\varepsilon_d$ | $\chi_{sub}$ | $\chi_{TM}$ | $\Phi$ |
|----------------------------------|------------|-----------------|--------------|-------------|--------|
| Sc@C <sub>2</sub> N              | 1          | 1.22            | 2.71         | 1.36        | 1.57   |
| Ti@C <sub>2</sub> N              | 2          | 0.88            | 2.71         | 1.54        | 0.55   |
| V@C <sub>2</sub> N               | 3          | 1.38            | 2.71         | 1.63        | 0.57   |
| Cr@C <sub>2</sub> N              | 5          | -0.02           | 2.71         | 1.66        | 0.00   |
| Mn@C <sub>2</sub> N              | 5          | -1.15           | 2.71         | 1.55        | -0.29  |
| Zn@C <sub>2</sub> N              | 10         | -7.49           | 2.71         | 1.65        | -0.93  |
| Y@C <sub>2</sub> N               | 1          | 1.99            | 2.71         | 1.22        | 2.27   |
| Zr@C <sub>2</sub> N              | 2          | 1.65            | 2.71         | 1.33        | 1.07   |
| Nb@C <sub>2</sub> N              | 4          | 0.29            | 2.71         | 1.59        | 0.09   |
| Ag@C <sub>2</sub> N              | 10         | -2.70           | 2.71         | 1.92        | -0.32  |
| Hf@C <sub>2</sub> N              | 2          | 1.80            | 2.71         | 1.32        | 1.16   |
| Sc@CN                            | 1          | 1.17            | 2.80         | 1.36        | 1.53   |
| Ti@CN                            | 2          | 1.18            | 2.80         | 1.54        | 0.75   |
| V@CN                             | 3          | 1.92            | 2.80         | 1.63        | 0.81   |
| Cr@CN                            | 5          | -0.25           | 2.80         | 1.66        | -0.06  |
| Mn@CN                            | 5          | -1.18           | 2.80         | 1.55        | -0.30  |
| Zn@CN                            | 10         | -7.64           | 2.80         | 1.65        | -0.96  |
| Y@CN                             | 1          | 1.59            | 2.80         | 1.22        | 1.81   |
| Zr@CN                            | 2          | 1.43            | 2.80         | 1.33        | 0.94   |
| Nb@CN                            | 4          | 0.48            | 2.80         | 1.59        | 0.15   |
| Ag@CN                            | 10         | -2.73           | 2.80         | 1.92        | -0.33  |
| Hf@CN                            | 2          | 1.63            | 2.80         | 1.32        | 1.07   |
| Sc@C <sub>3</sub> N <sub>4</sub> | 1          | 1.18            | 2.83         | 1.36        | 1.28   |
| Ti@C <sub>3</sub> N <sub>4</sub> | 2          | 1.09            | 2.83         | 1.54        | 0.59   |

---

|                                  |    |       |      |      |       |
|----------------------------------|----|-------|------|------|-------|
| V@C <sub>3</sub> N <sub>4</sub>  | 3  | 0.85  | 2.83 | 1.63 | 0.30  |
| Y@C <sub>3</sub> N <sub>4</sub>  | 1  | 2.16  | 2.83 | 1.22 | 2.37  |
| Zr@C <sub>3</sub> N <sub>4</sub> | 2  | 2.58  | 2.83 | 1.33 | 1.40  |
| Nb@C <sub>3</sub> N <sub>4</sub> | 4  | 3.16  | 2.83 | 1.59 | 0.85  |
| Hf@C <sub>3</sub> N <sub>4</sub> | 2  | 1.94  | 2.83 | 1.32 | 1.06  |
| Sc@C <sub>4</sub> N <sub>3</sub> | 1  | 1.55  | 2.76 | 1.36 | 1.83  |
| Ti@C <sub>4</sub> N <sub>3</sub> | 2  | -0.11 | 2.76 | 1.54 | -0.06 |
| V-C <sub>4</sub> N <sub>3</sub>  | 3  | 0.23  | 2.76 | 1.63 | 0.09  |
| Cr@C <sub>4</sub> N <sub>3</sub> | 5  | -0.75 | 2.76 | 1.66 | -0.17 |
| Mn@C <sub>4</sub> N <sub>3</sub> | 5  | -0.17 | 2.76 | 1.55 | -0.04 |
| Fe@C <sub>4</sub> N <sub>3</sub> | 6  | -1.33 | 2.76 | 1.83 | -0.25 |
| Co@C <sub>4</sub> N <sub>3</sub> | 7  | -1.88 | 2.76 | 1.88 | -0.30 |
| Ni@C <sub>4</sub> N <sub>3</sub> | 8  | -1.78 | 2.76 | 1.92 | -0.25 |
| Cu@C <sub>4</sub> N <sub>3</sub> | 10 | -2.21 | 2.76 | 1.9  | -0.25 |
| Zn@C <sub>4</sub> N <sub>3</sub> | 10 | -6.34 | 2.76 | 1.65 | -0.73 |
| Y@C <sub>4</sub> N <sub>3</sub>  | 1  | 2.13  | 2.76 | 1.22 | 2.54  |
| Zr@C <sub>4</sub> N <sub>3</sub> | 2  | 0.52  | 2.76 | 1.33 | 0.31  |
| Nb@C <sub>4</sub> N <sub>3</sub> | 4  | -0.22 | 2.76 | 1.59 | -0.06 |
| Mo@C <sub>4</sub> N <sub>3</sub> | 5  | -0.84 | 2.76 | 2.16 | -0.18 |
| Ru@C <sub>4</sub> N <sub>3</sub> | 7  | -1.48 | 2.76 | 2.2  | -0.23 |
| Rh@C <sub>4</sub> N <sub>3</sub> | 8  | -2.50 | 2.76 | 2.28 | -0.33 |
| Hf@C <sub>4</sub> N <sub>3</sub> | 2  | 0.06  | 2.76 | 1.32 | 0.03  |
| Ta@C <sub>4</sub> N <sub>3</sub> | 3  | -0.77 | 2.76 | 1.51 | -0.30 |
| Sc@C <sub>9</sub> N <sub>4</sub> | 1  | 0.98  | 2.70 | 1.36 | 1.26  |
| Ti@C <sub>9</sub> N <sub>4</sub> | 2  | 0.64  | 2.70 | 1.54 | 0.40  |
| V@C <sub>9</sub> N <sub>4</sub>  | 3  | 0.87  | 2.70 | 1.63 | 0.36  |
| Cr@C <sub>9</sub> N <sub>4</sub> | 5  | -0.47 | 2.70 | 1.66 | -0.11 |
| Ni@C <sub>9</sub> N <sub>4</sub> | 8  | -1.20 | 2.70 | 1.92 | -0.18 |
| Cu@C <sub>9</sub> N <sub>4</sub> | 10 | -1.21 | 2.70 | 1.9  | -0.14 |

---

---

|                                  |    |       |      |      |       |
|----------------------------------|----|-------|------|------|-------|
| Zn@C <sub>9</sub> N <sub>4</sub> | 10 | -7.77 | 2.70 | 1.65 | -0.96 |
| Y@C <sub>9</sub> N <sub>4</sub>  | 1  | 1.89  | 2.70 | 1.22 | 2.05  |
| Zr@C <sub>9</sub> N <sub>4</sub> | 2  | 1.31  | 2.70 | 1.33 | 0.85  |
| Nb@C <sub>9</sub> N <sub>4</sub> | 4  | 0.45  | 2.70 | 1.59 | 0.14  |
| Ag@C <sub>9</sub> N <sub>4</sub> | 10 | -2.19 | 2.70 | 1.92 | -0.26 |
| Hf@C <sub>9</sub> N <sub>4</sub> | 2  | 1.48  | 2.70 | 1.32 | 0.96  |
| Ta@C <sub>9</sub> N <sub>4</sub> | 3  | 0.43  | 2.70 | 1.51 | 0.18  |

---

**Table S5.** The d-band center ( $\varepsilon_d$ ) and the electron transfer number on  $N_2$  (Q) of Zn-anchored SACs.

| SACs                             | $\varepsilon_d$ | Q       |
|----------------------------------|-----------------|---------|
| Zn@C <sub>2</sub> N              | -7.49           | 0.0105  |
| Zn@CN                            | -7.64           | 0.0050  |
| Zn@C <sub>4</sub> N <sub>3</sub> | -6.34           | -0.0052 |
| Zn@C <sub>9</sub> N <sub>4</sub> | -7.77           | 0.0074  |



**Table S6.** The relevant feature data of TM@C<sub>8</sub>N<sub>8</sub>, along with the limiting potential values predicted (Pred\_U<sub>L</sub>) based on the descriptor  $\Phi$ .

| SACs                             | $\theta_d$ | $\varepsilon_d$ | $\chi_{sub}$ | $\chi_{TM}$ | $\Phi$ | Pred_U <sub>L</sub> |
|----------------------------------|------------|-----------------|--------------|-------------|--------|---------------------|
| Sc@C <sub>8</sub> N <sub>8</sub> | 1          | 1.35            | 2.80         | 1.36        | 1.53   | -0.81               |
| Ti@C <sub>8</sub> N <sub>8</sub> | 2          | 1.22            | 2.80         | 1.54        | 0.68   | -0.52               |
| V@C <sub>8</sub> N <sub>8</sub>  | 3          | 1.16            | 2.80         | 1.63        | 0.43   | -0.43               |
| Cr@C <sub>8</sub> N <sub>8</sub> | 5          | 0.41            | 2.80         | 1.66        | 0.09   | -0.46               |
| Mn@C <sub>8</sub> N <sub>8</sub> | 5          | -0.90           | 2.80         | 1.55        | -0.20  | -1.08               |
| Fe@C <sub>8</sub> N <sub>8</sub> | 6          | -0.51           | 2.80         | 1.83        | -0.09  | -0.85               |
| Co@C <sub>8</sub> N <sub>8</sub> | 7          | -0.42           | 2.80         | 1.88        | -0.06  | -0.79               |
| Ni@C <sub>8</sub> N <sub>8</sub> | 8          | -1.17           | 2.80         | 1.92        | -0.16  | -0.99               |
| Cu@C <sub>8</sub> N <sub>8</sub> | 10         | -2.17           | 2.80         | 1.9         | -0.24  | -1.16               |
| Zn@C <sub>8</sub> N <sub>8</sub> | 10         | -6.80           | 2.80         | 1.65        | -0.75  | -2.26               |
| Y@C <sub>8</sub> N <sub>8</sub>  | 1          | 2.20            | 2.80         | 1.22        | 2.51   | -1.16               |
| Zr@C <sub>8</sub> N <sub>8</sub> | 2          | 2.92            | 2.80         | 1.33        | 1.66   | -0.86               |
| Nb@C <sub>8</sub> N <sub>8</sub> | 4          | 1.30            | 2.80         | 1.59        | 0.36   | -0.41               |
| Mo@C <sub>8</sub> N <sub>8</sub> | 5          | 0.59            | 2.80         | 2.16        | 0.13   | -0.38               |
| Ru@C <sub>8</sub> N <sub>8</sub> | 7          | -0.30           | 2.80         | 2.2         | -0.04  | -0.75               |
| Rh@C <sub>8</sub> N <sub>8</sub> | 8          | -0.63           | 2.80         | 2.28        | -0.08  | -0.83               |
| Pd@C <sub>8</sub> N <sub>8</sub> | 10         | -2.87           | 2.80         | 2.2         | -0.30  | -1.30               |
| Ag@C <sub>8</sub> N <sub>8</sub> | 10         | -3.59           | 2.80         | 1.92        | -0.39  | -1.48               |
| Cd@C <sub>8</sub> N <sub>8</sub> | 10         | -8.11           | 2.80         | 1.69        | -0.90  | -2.57               |
